# Supplementary material for: Insights into the transglucosylation activity of α-glucosidase from Schwanniomyces occidentalis
Source: Springer Nature journal article supplement (doi:10.1007/s00253-024-13262-8), 2024-08-17
Supplement: MOESM1 [file 253_2024_13262_MOESM1_ESM.pdf]

## Supplementary Materials

### Insights into the transglucosylation activity of $\alpha$ -glucosidase from *Schwanniomyces occidentalis*

Zoran Merdzo<sup>1</sup>, Egle Narmontaite<sup>1</sup>, Jose L Gonzalez-Alfonso<sup>2</sup>, Ana Poveda<sup>3</sup>, Jesus Jimenez-Barbero<sup>3</sup>, Francisco J. Plou<sup>2</sup>, María Fernández-Lobato<sup>1\*</sup>

|            |                                                                                                    |
|------------|----------------------------------------------------------------------------------------------------|
| Figure S1  | SDS-PAGE (10%) analysis of the GAMp expression in <i>Pichia pastoris</i> .                         |
| Figure S2  | MS-ESI analysis of the major product of sucrose transglycosylation.                                |
| Figure S3  | NMR analysis of the major product obtained by glucosylation of sucrose (Theanderose)               |
| Figure S4  | MS-ESI analysis of the major product of xylose transglycosylation                                  |
| Figure S5  | NMR analysis of the major product obtained by glucosylation of xylose.                             |
| Figure S6  | Stability of GAM1p in DMSO.                                                                        |
| Figure S7  | MS-ESI analysis of the diglycosylated piceid obtained by transglycosylation.                       |
| Figure S8  | MS-ESI analysis of the monoglycosylated piceid obtained by transglycosylation.                     |
| Figure S9  | MS-ESI analysis of the transglycosylation product of resveratrol.                                  |
| Figure S10 | Aromatic region of the <sup>1</sup> H-NMR spectra of Piceid, Glc-Piceid and di-Glc Piceid samples. |
| Figure S11 | ROESY and HSQC spectrum of piceid monoglucoside and diglucoside.                                   |
| Figure S12 | Assignment of the minor glucosylated product of piceid (contaminated with piceid).                 |
| Figure S13 | GAM1p Structural Alignment.                                                                        |

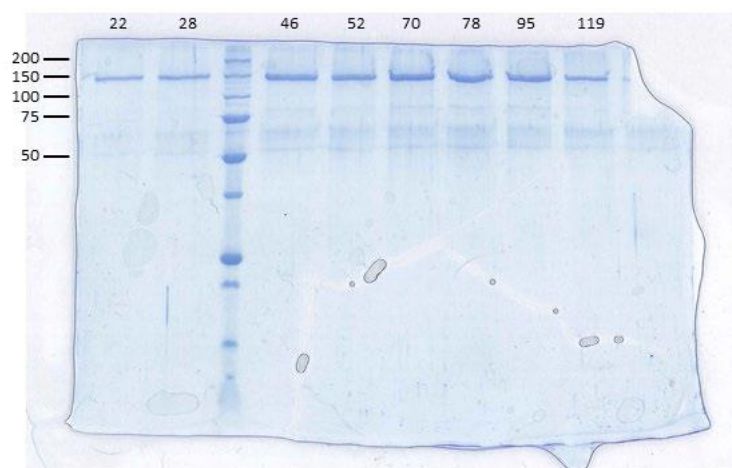

**Figure S1. SDS-PAGE (10%) analysis of the GAM expression in *Pichia pastoris*.** The majority band of almost 145 kDa corresponds to the heterologous protein, that was not detected in yeast transformants including the empty pIB4 vector. Extracellular medium of the transformant (10  $\mu$ L) including the GAM1-pIB4 construction and cultured in BMM were loaded at the indicated times (in h). Numbers on the left indicate positions of molecular mass standards (lane between 28-46 h) in kDa.

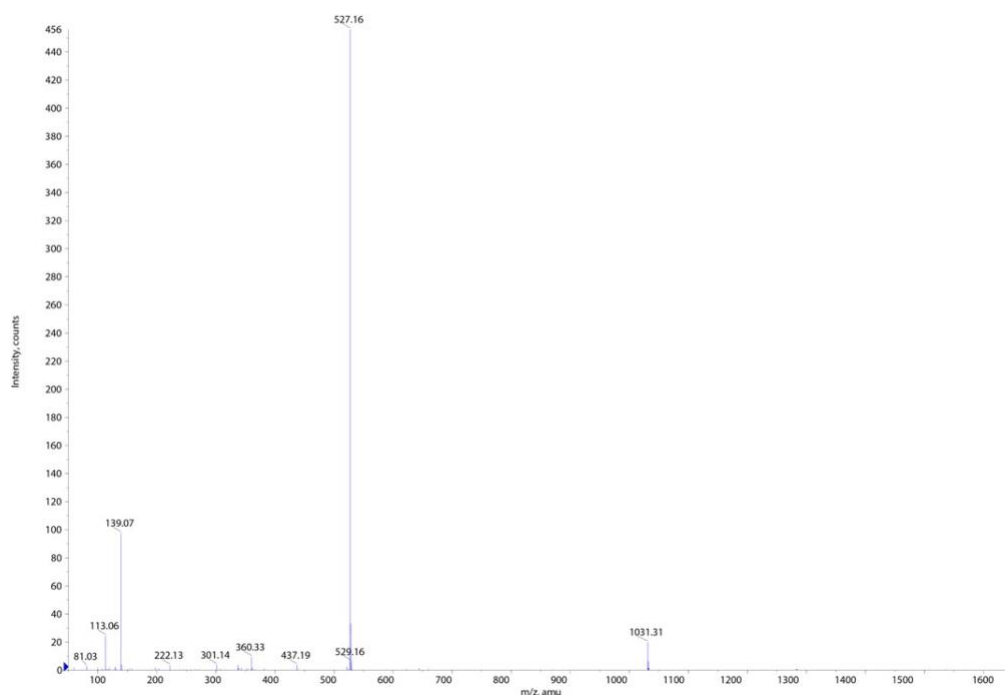

**Figure S2. MS-ESI analysis of the major product of sucrose transglycosylation.** The majority sugar produced was purified with a semipreparative column using HPLC. The majority signal of about 527 m/z corresponded to the predicted atomic mass of a trisaccharide, 504 Da + sodium adducts (due to the use of NaI as ionizing phase in the test).

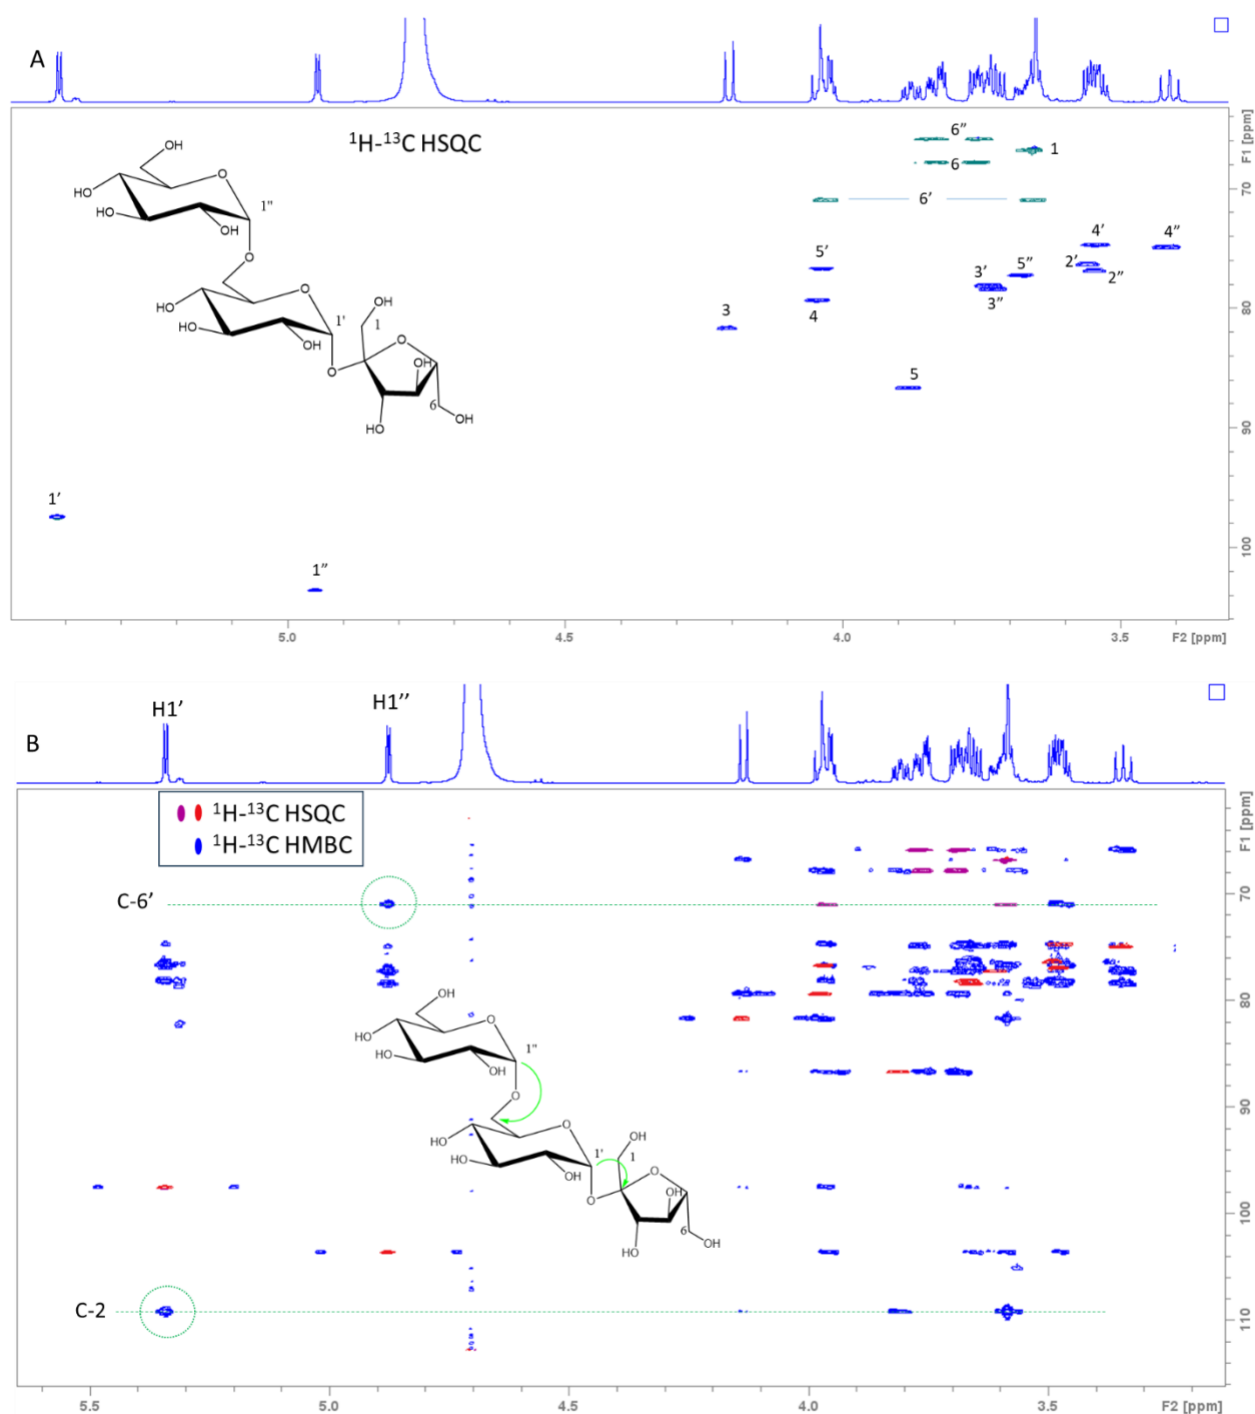

**Figure S3. NMR analysis of the major product obtained by glucosylation of sucrose.** (A)  $^1\text{H}$ - $^{13}\text{C}$  HSQC spectrum with the complete assignments of the NMR signals. (B) Superimposition of  $^1\text{H}$ - $^{13}\text{C}$  HMBC (blue) and  $^1\text{H}$ - $^{13}\text{C}$  HSQC (red, violet) spectra, highlighting the key glycosylation correlations: the H1' anomeric proton from original Glc ring correlates with the quaternary carbon C-2 of fructose ring (as in sucrose) and anomeric proton H1'' from the incorporated Glc ring correlates with the carbon C-6' of the glucose ring originally belonging to the sucrose, giving rise to the anderose trisaccharide.

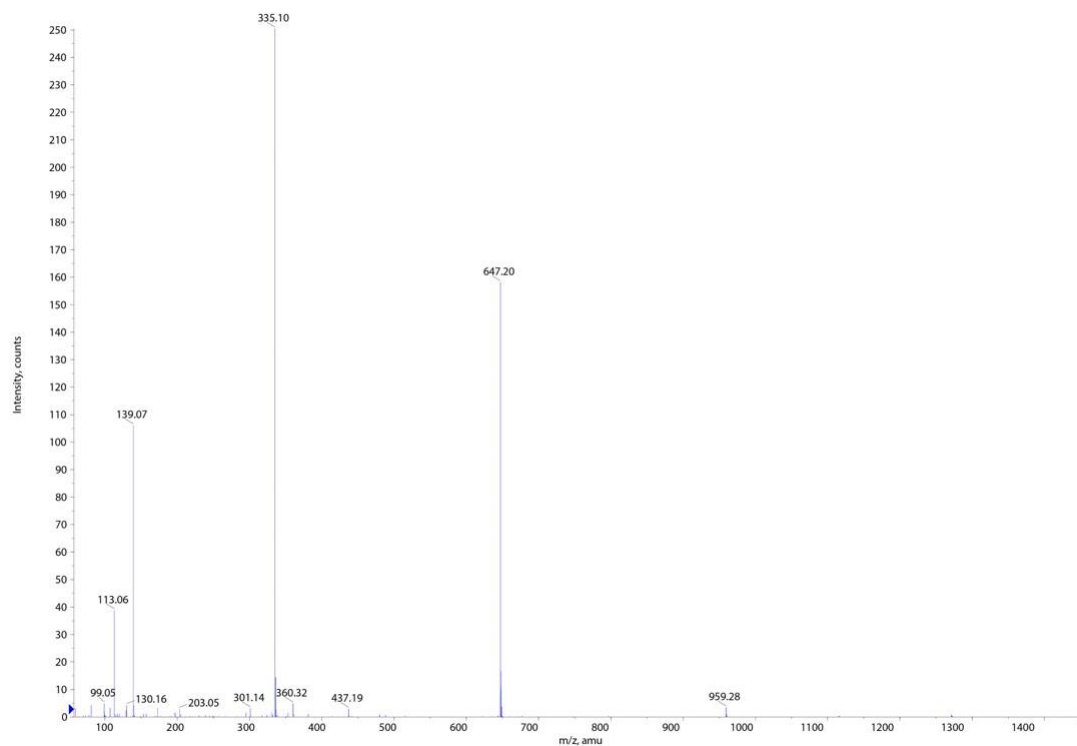

**Figure S4. MS-ESI analysis of the major product of xylose transglycosylation.** Analysis of the purified major sugar with a semipreparative column using HPLC. The majority signal of about 335 m/z corresponded to the predicted atomic mass of the disaccharide glucosyl-xylose, 312 Da + sodium adducts (due to the use of NaI as ionizing phase in the test).

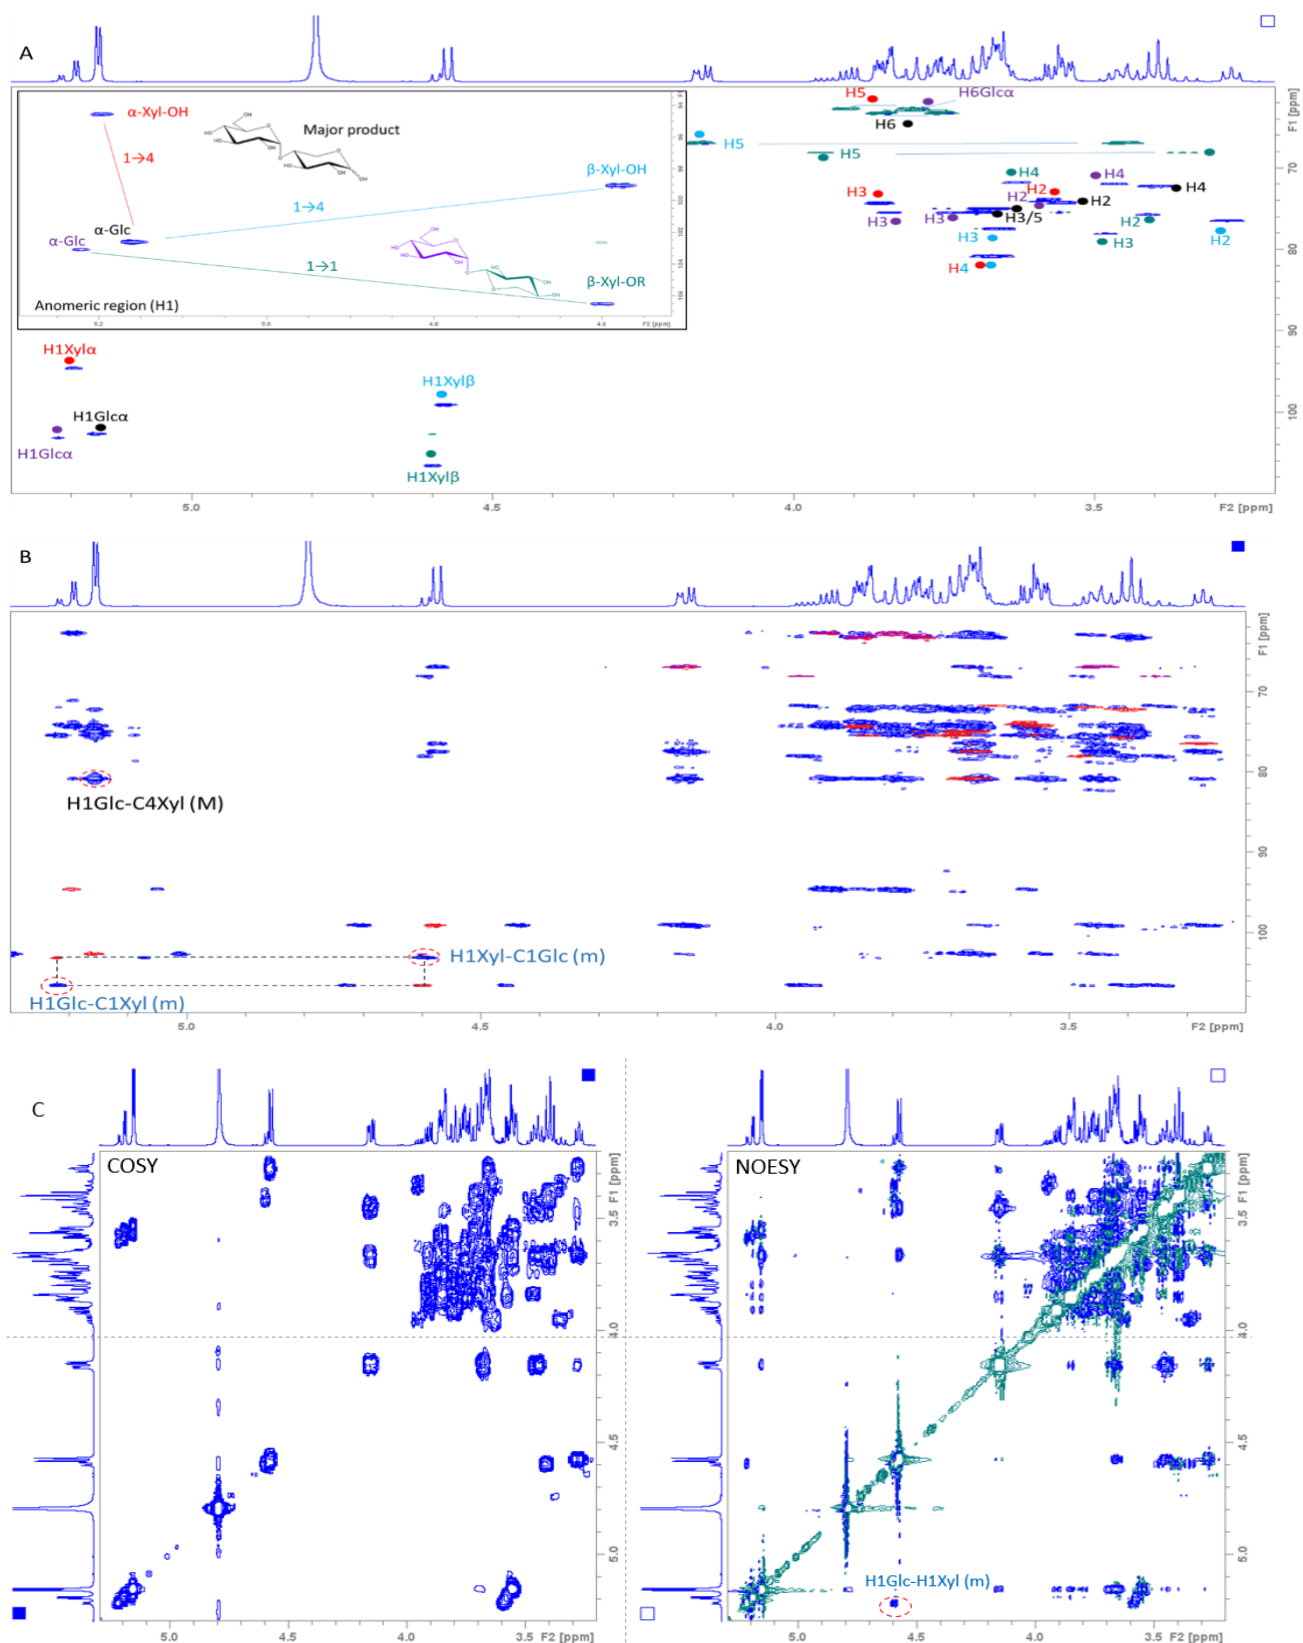

**Figure S5.** NMR analysis of the major product obtained by glucosylation of xylose. (A)  $^1\text{H}$ - $^{13}\text{C}$  HSQC spectrum with complete assignments of the NMR signals. (B) Superimposition of  $^1\text{H}$ - $^{13}\text{C}$  HMBC (blue) and  $^1\text{H}$ - $^{13}\text{C}$  HSQC (red, violet) spectra, with the key glycosylation correlations highlighted: The anomeric proton H1 from the major Glc moiety correlates with carbon C-4 of the xylose ring (both  $\alpha$  and  $\beta$  residues) giving rise to  $\alpha$ -D-glucopyranosyl-(1-4)- $\alpha$ -D-xylopyranose. For the minor product, the anomeric proton H1

from the Glc ring correlates with the carbon C-1 of the Xylose ring with  $\beta$  configuration, giving rise to  $\alpha$ -D-glucopyranosyl-(1-1)- $\beta$ -D-xylopyranose. (C) The analysis of the COSY (left) and NOESY (right) spectra allowed assessing the H1Glc-H1Xyl NOE found for the minor product.

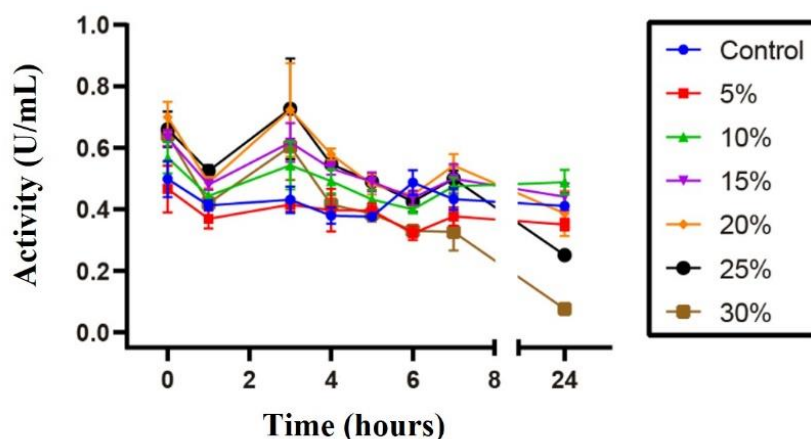

**Figure S6. Stability of GAM1 in Dimethyl sulfoxide (DMSO).** GAM1- was maintained at 37°C in the referred concentrations of DMSO (v/v) buffered with 50 mM sodium acetate pH 4.5 after which the activity was analyzed using 2 mM maltose. The control was incubated with the buffer alone.

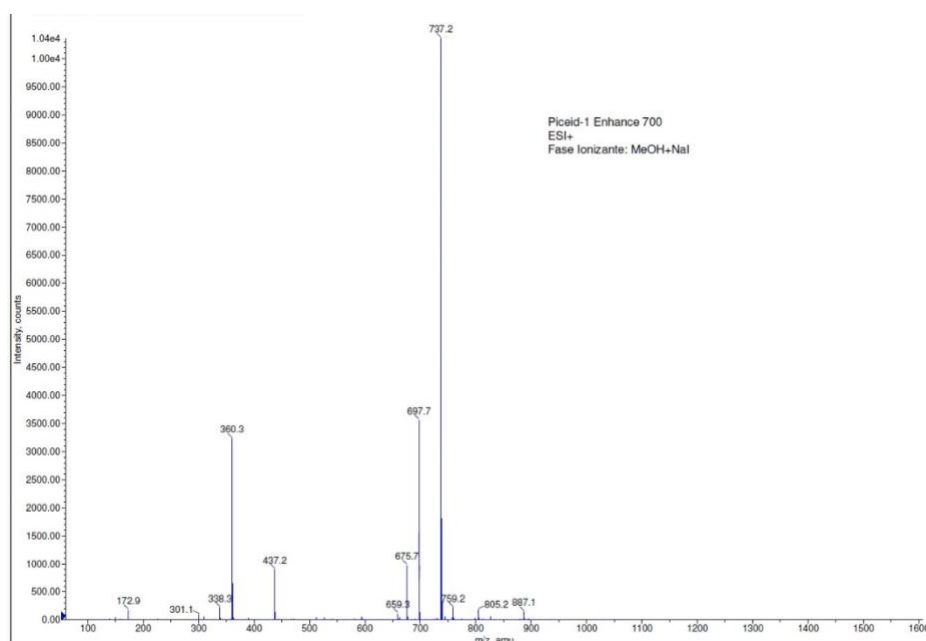

**Figure S7. MS-ESI analysis of the diglycosylated piceid obtained by transglycosylation.** Product purified by semipreparative column using HPLC from peak 1 of the chromatogram showed in Figure 6a. The majority signal of about 737 m/z corresponded to the predicted atomic mass of the diglycosylated piceid, 714 Da + sodium adducts (due to the use of NaI as ionizing phase in the test).

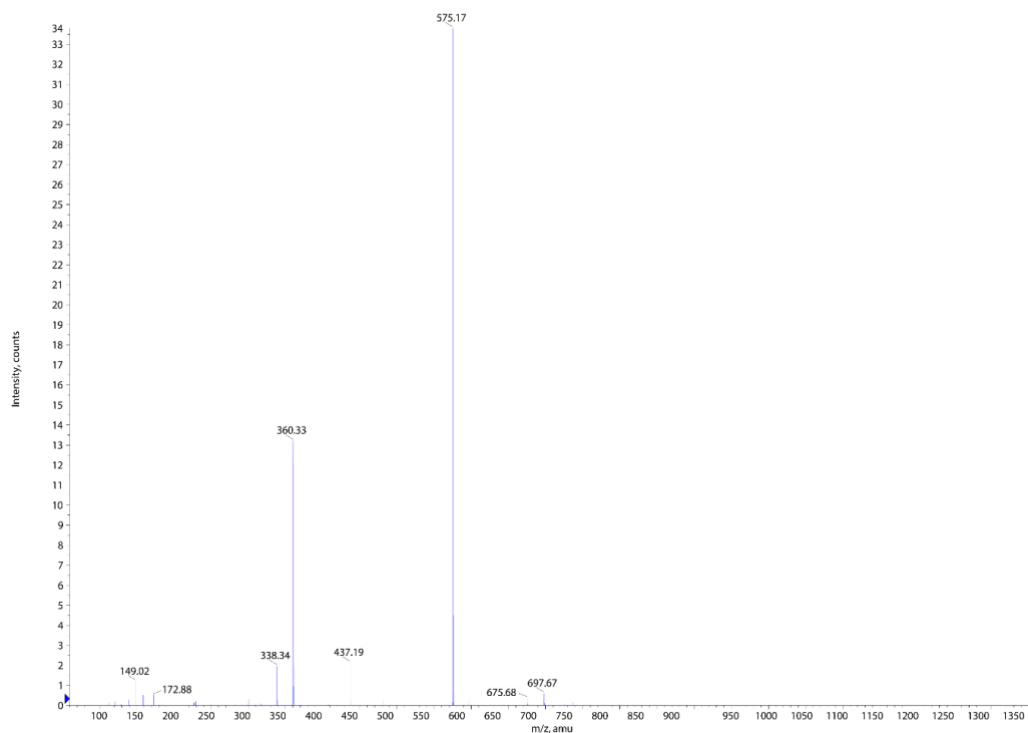

**Figure S8. MS-ESI analysis of the monoglycosylated piceid obtained by transglycosylation.** Product purified by semipreparative column by HPLC from peak 2 of the chromatogram showed in Figure 6a. The majority signal of about 575 m/z corresponded to the predicted atomic mass of the monoglycosylated piceid, 552 Da + sodium adducts (due to the use of NaI as ionizing phase in the test).

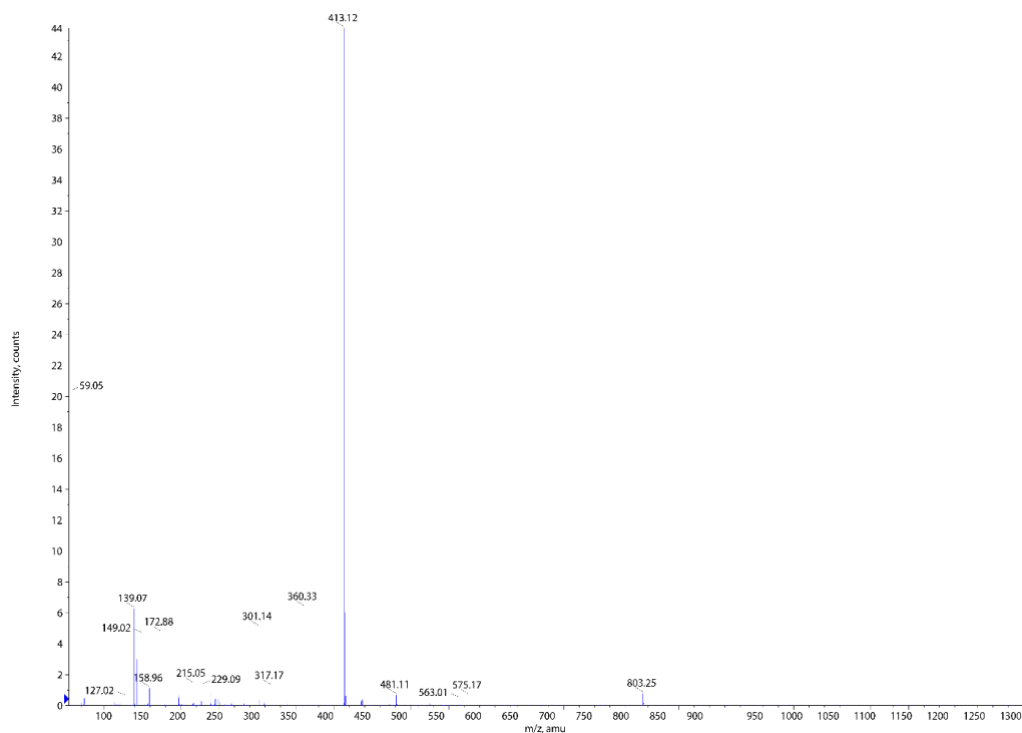

**Figure S9.** MS-ESI analysis of the transglycosylation product of resveratrol. Product purified by semipreparative column using HPLC from peak 3 of the chromatogram showed in Figure 6a. The majority signal of about 413 m/z corresponded to the predicted atomic mass of the monoglycosylated resveratrol, 390 Da + sodium adducts (due to the use of NaI as ionizing phase in the test).

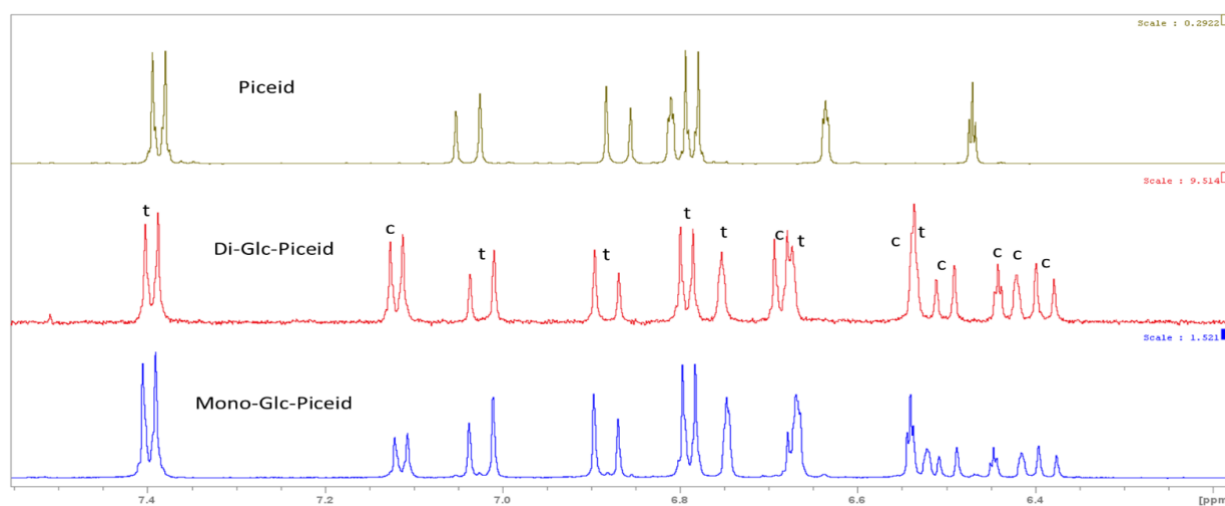

**Figure S10.** Aromatic region of the  $^1\text{H}$ -NMR spectra of Piceid, Glc-Piceid and di-Glc Piceid samples. For the glucosylated samples, both the *cis* (*c*) and *trans* (*t*) piceid moieties at the double bond are present.



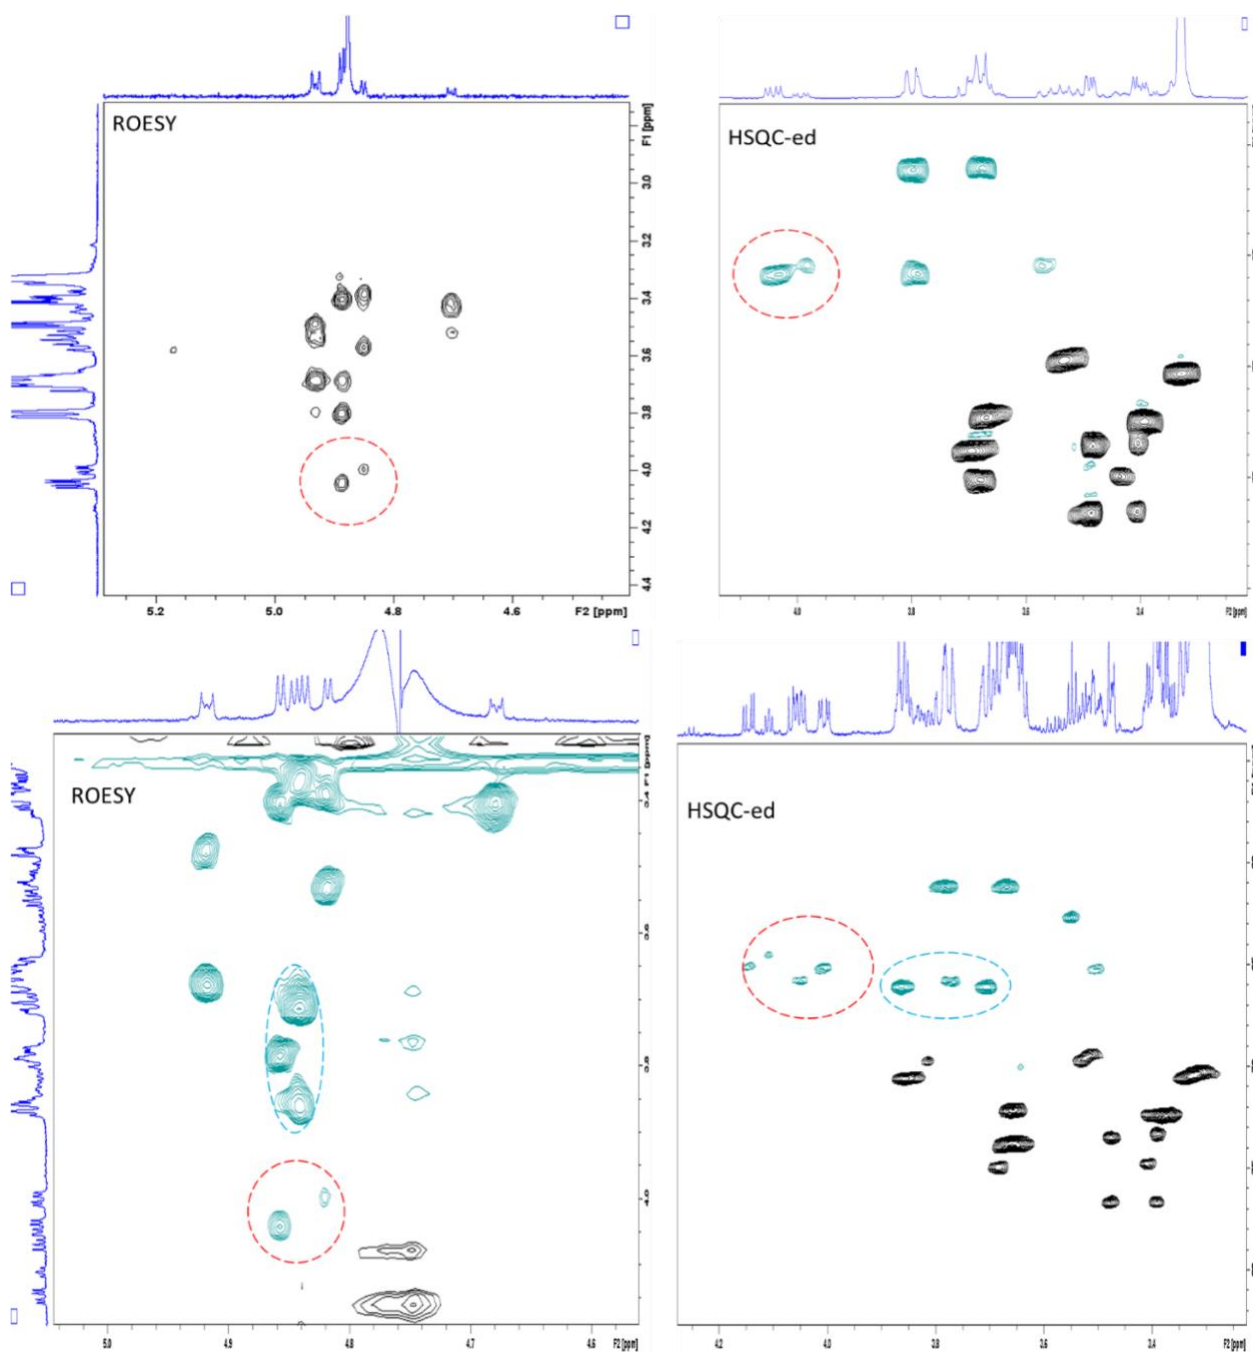

**Figure S11. Partial ROESY and HSQC spectrum of piceid monoglucoside (top panels) and diglucoside (bottom panels).** The ROESY spectra indicate that the Glc is linked by an  $\alpha$ -(1-6) glycosidic bond and the HSQC indicate that the methylene groups appear at  $^{13}\text{C}$  chemical shifts of 65 ppm, as corresponds to  $\text{CH}_2\text{-O-}$  glycosylated groups.

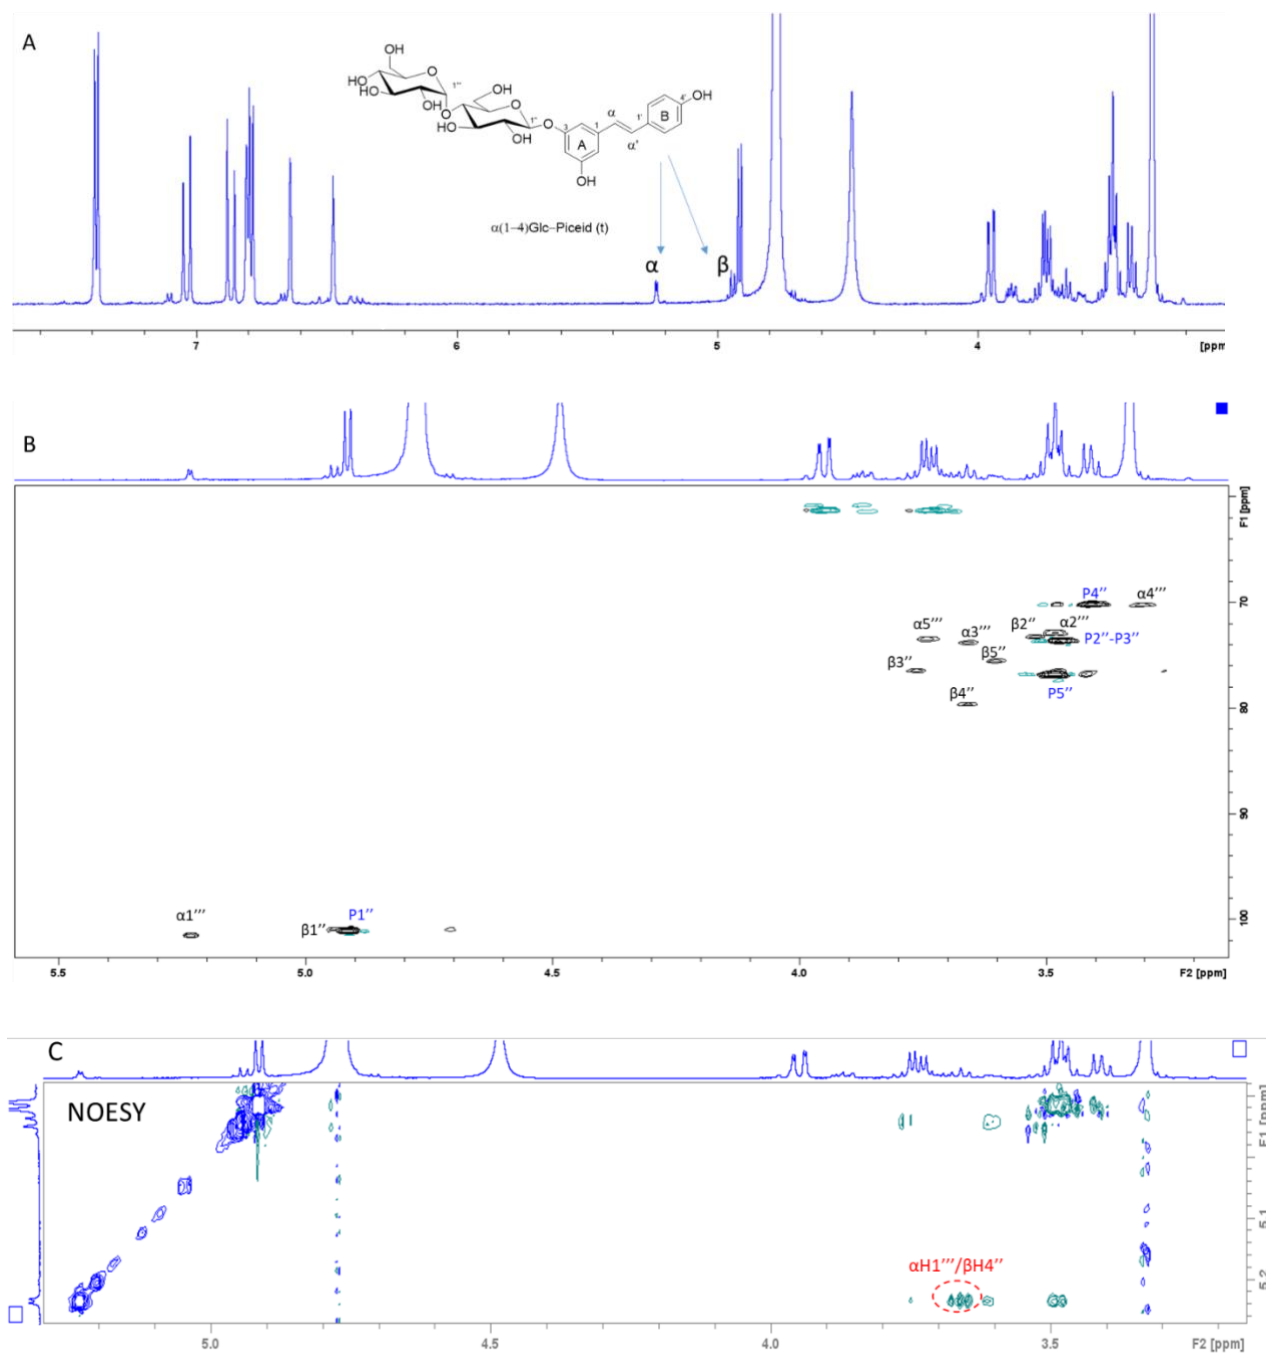

**Figure S12. Assignment of the minor glucosylated product of piceid (contaminated with piceid): (A)  $^1\text{H}$ -NMR spectrum, (B) Partial HSQC spectrum of the sugars region.** The signals of a new glucose unit linked to the piceid motive through  $\alpha$ -(1-4) linkage were identified (black labels). Piceid major product signals are labelled in blue. (C) Section of NOESY spectrum showing the  $\text{H}1'''$ - $\text{H}4''$  NOE that confirms the 1-4 linkage.

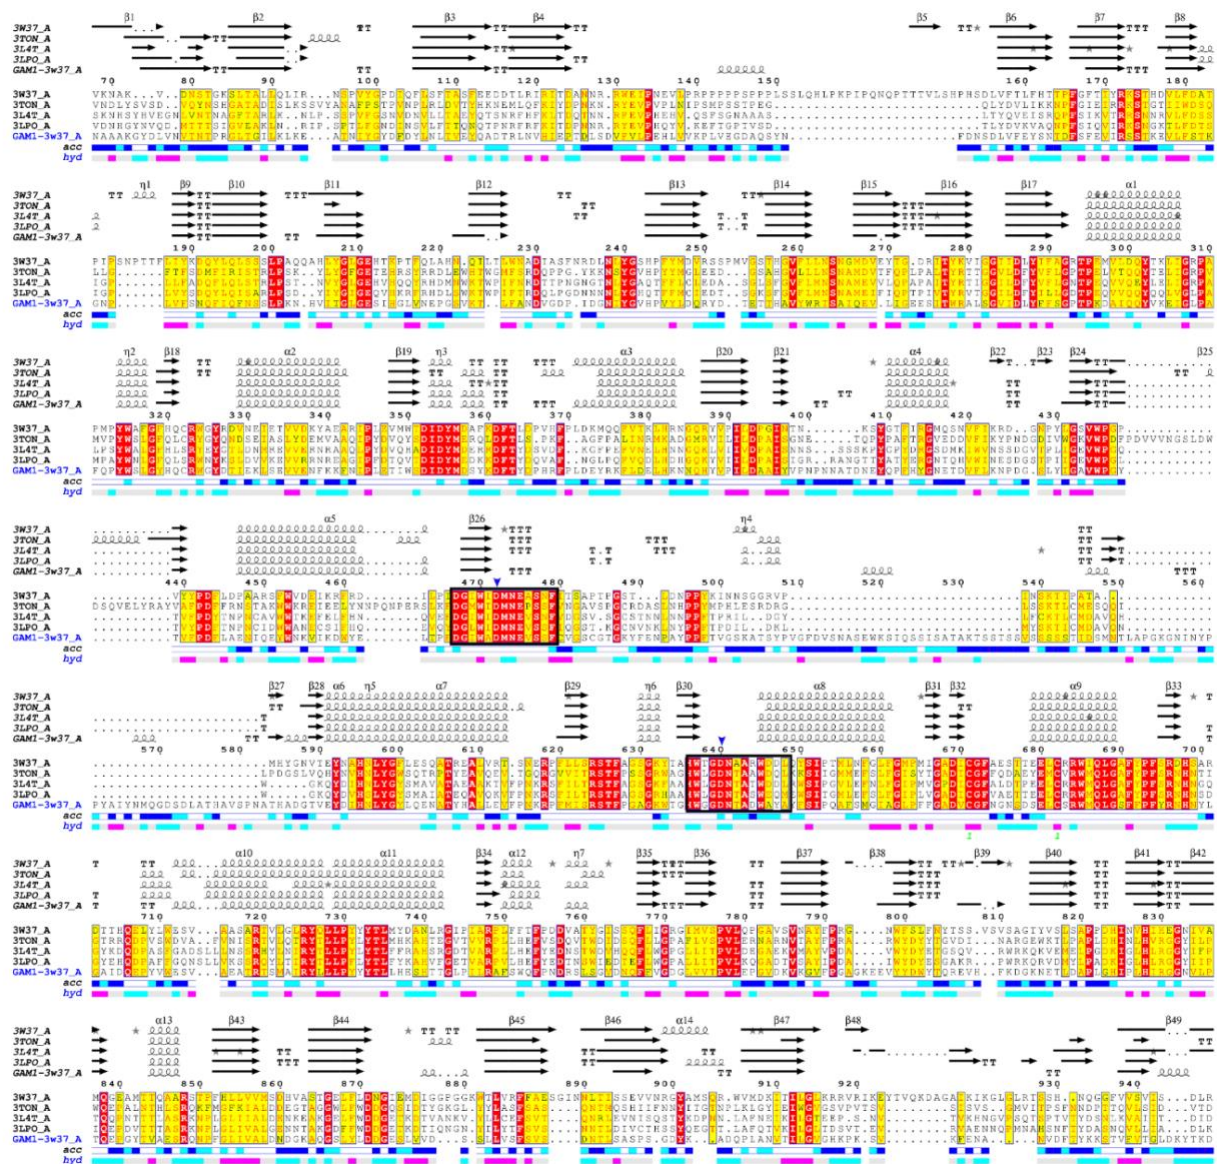

**Figure S13. GAM1p Structural Alignment.** Result of the alignment of sequences of the GAM1p model created with reference to the  $\alpha$ -glucosidase of *Beta vulgaris* against the 47 most homologous sequences obtained by ENDscript 2.0 (only the 4 sequences with the best alignment are shown). The secondary structures are shown at the top (helices with spirals,  $\beta$ -sheets with arrows, and turns with the letters TT). Similar residues are marked in yellow, identical residues in red, and catalytic residues with a blue arrow pointing downward at the top. The conserved motifs of the catalytic region are framed in black. The representative sequences shown are:  $\alpha$ -glucosidase of *B. vulgaris* (PDB: 3W37), the C-terminal (PDB: 3TON) and N-terminal domains of human maltase-glucoamylase (PDB: 3L4T) and of human sucrase-isomaltase (PDB: 3LPO), respectively.
